# Supplementary material for: Exposure to E-Cigarette Advertisements or Reviews and E-Cigarette Use Progression: A Longitudinal Examination of Short-Term and Long-Term Associations among US Young Adults
Source: MDPI journal article supplement (doi:10.3390/ijerph21020123), 2024-01-23
Supplement: s1 [file s1]

**Supplementary Figure S1. Flowchart for participants included in final analysis by e-cigarette using status.**

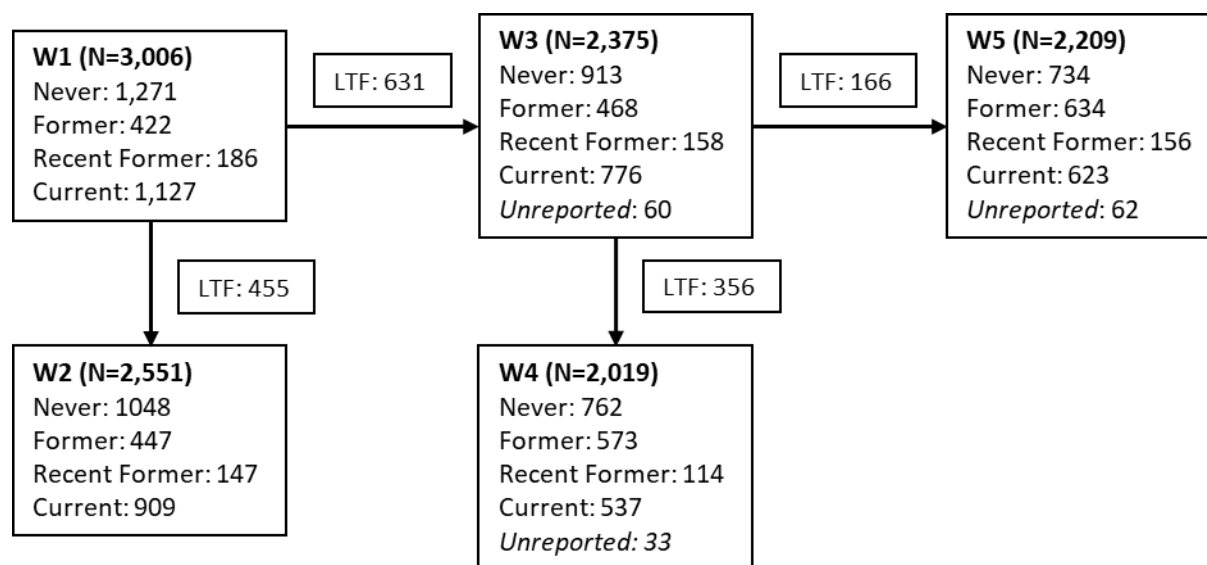

Note: LTF: loss to follow-up; Vertical arrows are 6-month/short-term follow-ups, and horizontal arrows are 12-month/long-term follow-ups.

**Supplementary Table S1. Baseline (Wave 1 or Wave 3) exposure to e-cigarette ads or reviews in the past 30 days and demographics by baseline e-cigarette use status.**

|                                         | Wave 1                          |                                |                                 |                                   | Wave 3                        |                                |                                 |                                 |
|-----------------------------------------|---------------------------------|--------------------------------|---------------------------------|-----------------------------------|-------------------------------|--------------------------------|---------------------------------|---------------------------------|
|                                         | Never users<br>N=1,271<br>% (n) | Former users<br>N=422<br>% (n) | Recent former<br>N=186<br>% (n) | Current users<br>N=1,127<br>% (n) | Never users<br>N=913<br>% (n) | Former users<br>N=468<br>% (n) | Recent former<br>N=158<br>% (n) | Current users<br>N=776<br>% (n) |
| <b>Baseline characteristics</b>         |                                 |                                |                                 |                                   |                               |                                |                                 |                                 |
| Exposure to e-cigarette ads, N (%)      |                                 |                                |                                 |                                   |                               |                                |                                 |                                 |
| Frequent                                | 31.9 (405)                      | 28.9 (122)                     | 33.3 (62)                       | 37.4 (422)                        | 40.5 (370)                    | 43.4 (203)                     | 35.4 (56)                       | 39.3 (305)                      |
| Not frequent                            | 68.1 (866)                      | 71.1 (300)                     | 66.7 (124)                      | 62.6 (705)                        | 59.5 (543)                    | 56.6 (265)                     | 64.6 (102)                      | 60.7 (471)                      |
| Exposure to e-cigarette reviews, N (%)  |                                 |                                |                                 |                                   |                               |                                |                                 |                                 |
| Frequent                                | 10.0 (127)                      | 8.3 (35)                       | 13.4 (25)                       | 29.6 (333)                        | 11.5 (105)                    | 16.7 (78)                      | 13.3 (21)                       | 22.3 (173)                      |
| Not frequent                            | 90.0 (1,144)                    | 91.7 (387)                     | 86.6 (161)                      | 70.5 (794)                        | 88.5 (808)                    | 83.3 (390)                     | 86.7 (137)                      | 77.7 (603)                      |
| Age, M (SD)*                            | 24.81 (4.65)                    | 26.11 (4.55)                   | 23.22 (4.02)                    | 23.90 (4.78)                      | 26.01 (4.66)                  | 26.15 (4.56)                   | 25.8 (4.47)                     | 25.2 (4.76)                     |
| MSA, N (%)                              |                                 |                                |                                 |                                   |                               |                                |                                 |                                 |
| Atlanta                                 | 24.0 (305)                      | 19.0 (80)                      | 17.7 (33)                       | 15.5 (175)                        | 24.6 (225)                    | 16.9 (79)                      | 15.2 (24)                       | 18.3 (142)                      |
| Boston                                  | 22.5 (286)                      | 16.1 (68)                      | 19.4 (36)                       | 16.4 (185)                        | 21.6 (197)                    | 19.4 (91)                      | 21.5 (34)                       | 16.5 (128)                      |
| Minneapolis                             | 15.8 (201)                      | 19.0 (80)                      | 25.3 (47)                       | 19.1 (215)                        | 14.8 (135)                    | 19.2 (90)                      | 22.2 (35)                       | 17.7 (137)                      |
| Oklahoma City                           | 9.9 (126)                       | 11.1 (47)                      | 6.5 (12)                        | 11.9 (134)                        | 9.3 (85)                      | 10.0 (47)                      | 9.5 (15)                        | 9.8 (76)                        |
| San Diego                               | 15.5 (197)                      | 17.5 (74)                      | 17.2 (32)                       | 15.2 (171)                        | 13.7 (125)                    | 15.2 (71)                      | 14.6 (23)                       | 16.6 (129)                      |
| Seattle                                 | 12.3 (156)                      | 17.3 (73)                      | 14.0 (26)                       | 21.9 (247)                        | 11.5 (105)                    | 14.7 (69)                      | 11.4 (18)                       | 17.9 (139)                      |
| Other                                   | --                              | --                             | --                              | --                                | 4.5 (41)                      | 4.5 (21)                       | 5.7 (9)                         | 3.2 (25)                        |
| Sex, N (%)                              |                                 |                                |                                 |                                   |                               |                                |                                 |                                 |
| Male                                    | 39.8 (506)                      | 40.1 (169)                     | 33.9 (63)                       | 47.3 (533)                        | 37.4 (341)                    | 38.7 (181)                     | 42.4 (67)                       | 46.1 (358)                      |
| Female                                  | 57.6 (732)                      | 57.4 (242)                     | 62.9 (117)                      | 49.4 (557)                        | 60.2 (550)                    | 58.6 (274)                     | 54.4 (86)                       | 51.6 (400)                      |
| Other                                   | 2.6 (33)                        | 2.6 (11)                       | 3.2 (6)                         | 3.3 (37)                          | 2.4 (22)                      | 2.8 (13)                       | 3.2 (5)                         | 2.3 (18)                        |
| Race, N (%)                             |                                 |                                |                                 |                                   |                               |                                |                                 |                                 |
| Non-Hispanic White                      | 61.8 (761)                      | 70.9 (292)                     | 72.0 (131)                      | 66.5 (733)                        | 64.9 (576)                    | 66.1 (300)                     | 71.2 (109)                      | 65.8 (500)                      |
| Non-Hispanic Black                      | 6.3 (77)                        | 5.8 (24)                       | 3.9 (7)                         | 3.5 (38)                          | 5.9 (52)                      | 5.5 (25)                       | 3.3 (5)                         | 4.0 (30)                        |
| Non-Hispanic Other                      | 23.1 (285)                      | 14.1 (58)                      | 13.2 (24)                       | 16.9 (186)                        | 21.6 (192)                    | 17.0 (77)                      | 14.4 (22)                       | 17.5 (133)                      |
| Hispanic                                | 8.9 (109)                       | 9.2 (38)                       | 11.0 (20)                       | 13.2 (146)                        | 7.7 (68)                      | 11.5 (52)                      | 11.1 (17)                       | 12.8 (97)                       |
| Education > College degree, N (%)       | 81.4 (1,022)                    | 78.9 (329)                     | 71.2 (131)                      | 63.5 (709)                        | 84.6 (762)                    | 80.2 (372)                     | 73.7 (115)                      | 65.1 (499)                      |
| Employment, N (%)                       | 62.0 (770)                      | 69.9 (286)                     | 63.1 (113)                      | 66.1 (722)                        | 61.5 (547)                    | 67.4 (308)                     | 55.1 (86)                       | 67.3 (507)                      |
| Sexual minority, N (%)                  | 24.3 (303)                      | 34.3 (143)                     | 38.8 (71)                       | 34.9 (390)                        | 23.2 (207)                    | 33.4 (156)                     | 41.1 (65)                       | 33.5 (255)                      |
| Married, N (%)                          | 34.4 (437)                      | 42.7 (180)                     | 25.3 (47)                       | 36.9 (416)                        | 35.9 (328)                    | 41.5 (194)                     | 32.3 (51)                       | 37.1 (288)                      |
| Having child, N (%)                     | 10.9 (139)                      | 18.0 (76)                      | 4.8 (9)                         | 15.9 (179)                        | 11.3 (103)                    | 15.6 (73)                      | 8.9 (14)                        | 15.9 (123)                      |
| Other tobacco use, past 6 months, N (%) |                                 |                                |                                 |                                   |                               |                                |                                 |                                 |
| Cigarettes                              | 7.7 (98)                        | 32.7 (138)                     | 42.5 (79)                       | 60.2 (678)                        | 4.4 (40)                      | 27.4 (128)                     | 41.8 (66)                       | 56.3 (437)                      |
| Other tobacco products^                 | 11.3 (143)                      | 30.4 (128)                     | 43.6 (81)                       | 59.3 (666)                        | 7.5 (68)                      | 19.2 (90)                      | 33.5 (53)                       | 47.2 (366)                      |

^ Other tobacco included little cigars/cigarillos, hookah, and smokeless tobacco. \* M (SD) rather than % (n) reported.

**Supplementary Table S2. Baseline covariates by exposure to e-cigarette ads or reviews in the past 30 days.**

| Baseline characteristics                | Wave 1 exposure to e-cigarette ads |                                  | Wave 1 exposure to e-cigarette reviews |                                  | Wave 3 exposure to e-cigarette ads |                                  | Wave 3 exposure to e-cigarette reviews |                                  |
|-----------------------------------------|------------------------------------|----------------------------------|----------------------------------------|----------------------------------|------------------------------------|----------------------------------|----------------------------------------|----------------------------------|
|                                         | Frequent<br>N=1,011<br>% (n)       | Not frequent<br>N=1,995<br>% (n) | Frequent<br>N=520<br>% (n)             | Not frequent<br>N=2,486<br>% (n) | Frequent<br>N=953<br>% (n)         | Not frequent<br>N=1,422<br>% (n) | Frequent<br>N=386<br>% (n)             | Not frequent<br>N=1,989<br>% (n) |
| Exposure to e-cigarette ads             |                                    |                                  |                                        |                                  |                                    |                                  |                                        |                                  |
| Frequent                                | 100 (1,011)                        | 0 (0)                            | 75.2 (391)                             | 24.9 (620)                       | 100 (953)                          | 0 (0)                            | 81.1 (313)                             | 32.2 (640)                       |
| Not frequent                            | 0 (0)                              | 100 (1,995)                      | 24.8 (129)                             | 75.1 (1,866)                     | 0 (0)                              | 100 (1,422)                      | 18.9 (73)                              | 67.8 (1,349)                     |
| Exposure to e-cigarette reviews         |                                    |                                  |                                        |                                  |                                    |                                  |                                        |                                  |
| Frequent                                | 38.7 (391)                         | 6.5 (129)                        | 100 (520)                              | 0 (0)                            | 32.8 (313)                         | 5.1 (73)                         | 100 (386)                              | 0 (0)                            |
| Not frequent                            | 61.3 (620)                         | 93.5 (1,866)                     | 0 (0)                                  | 100 (2,486)                      | 67.2 (640)                         | 94.9 (1,349)                     | 0 (0)                                  | 100 (1,989)                      |
| Age, M (SD)                             | 24.57 (4.72)                       | 24.55 (4.71)                     | 24.60 (4.86)                           | 24.55 (4.68)                     | 24.61 (4.68)                       | 24.70 (4.68)                     | 25.14 (4.89)                           | 24.57 (4.64)                     |
| MSA, N (%)                              |                                    |                                  |                                        |                                  |                                    |                                  |                                        |                                  |
| Atlanta                                 | 17.7 (179)                         | 20.8 (414)                       | 14.0 (73)                              | 20.9 (520)                       | 20.8 (198)                         | 21.3 (303)                       | 20.5 (79)                              | 21.2 (422)                       |
| Boston                                  | 19.4 (196)                         | 19.0 (379)                       | 17.5 (91)                              | 19.5 (484)                       | 19.1 (182)                         | 21.6 (307)                       | 18.7 (72)                              | 21.0 (417)                       |
| Minneapolis                             | 16.3 (165)                         | 19.0 (378)                       | 15.4 (80)                              | 18.6 (463)                       | 17.3 (165)                         | 18.1 (257)                       | 13.2 (51)                              | 18.7 (371)                       |
| Oklahoma City                           | 14.7 (149)                         | 8.5 (170)                        | 15.6 (81)                              | 9.6 (238)                        | 12.3 (117)                         | 8.4 (120)                        | 14.0 (54)                              | 9.2 (183)                        |
| San Diego                               | 15.6 (158)                         | 15.8 (316)                       | 17.3 (90)                              | 15.5 (384)                       | 15.0 (143)                         | 16.4 (233)                       | 17.1 (66)                              | 15.6 (310)                       |
| Seattle                                 | 16.2 (164)                         | 16.9 (338)                       | 20.2 (105)                             | 16.0 (397)                       | 15.5 (148)                         | 14.2 (202)                       | 16.6 (64)                              | 14.4 (286)                       |
| Sex, N (%)                              |                                    |                                  |                                        |                                  |                                    |                                  |                                        |                                  |
| Male                                    | 44.7 (452)                         | 41.1 (819)                       | 47.3 (246)                             | 41.2 (1,025)                     | 41.7 (397)                         | 41.0 (583)                       | 43.5 (168)                             | 40.8 (812)                       |
| Female                                  | 52.7 (533)                         | 55.9 (1,115)                     | 49.4 (257)                             | 56.0 (1,391)                     | 55.0 (524)                         | 57.0 (811)                       | 53.6 (207)                             | 56.7 (1,128)                     |
| Other                                   | 2.6 (26)                           | 3.1 (61)                         | 3.3 (17)                               | 2.8 (70)                         | 3.4 (32)                           | 2.0 (28)                         | 2.9 (11)                               | 2.5 (49)                         |
| Race, N (%)                             |                                    |                                  |                                        |                                  |                                    |                                  |                                        |                                  |
| Non-Hispanic White                      | 67.7 (677)                         | 64.3 (1,250)                     | 60.4 (305)                             | 66.5 (1,612)                     | 68.3 (636)                         | 63.4 (877)                       | 61.5 (232)                             | 66.1 (1,281)                     |
| Non-Hispanic Black                      | 4.2 (41)                           | 5.4 (105)                        | 4.8 (24)                               | 5.0 (122)                        | 3.8 (35)                           | 5.7 (79)                         | 3.7 (14)                               | 5.2 (100)                        |
| Non-Hispanic Other                      | 16.2 (160)                         | 20.2 (393)                       | 18.2 (92)                              | 19.0 (461)                       | 16.2 (151)                         | 21.0 (290)                       | 17.8 (67)                              | 19.3 (374)                       |
| Hispanic                                | 12.0 (118)                         | 10.0 (195)                       | 16.6 (84)                              | 9.5 (229)                        | 11.7 (109)                         | 10.0 (138)                       | 17.0 (64)                              | 9.4 (183)                        |
| Education > College degree, N (%)       | 72.2 (725)                         | 74.5 (1,466)                     | 67.6 (349)                             | 75.0 (1,842)                     | 76.2 (719)                         | 76.5 (1,074)                     | 71.9 (276)                             | 77.2 (1,517)                     |
| Employment, N (%)                       | 67.2 (662)                         | 63.4 (1,229)                     | 68.8 (348)                             | 63.8 (1,543)                     | 65.1 (601)                         | 63.0 (876)                       | 68.9 (259)                             | 62.9 (1,218)                     |
| Sexual minority, N (%)                  | 31.1 (312)                         | 30.4 (595)                       | 29.9 (153)                             | 30.8 (754)                       | 32.0 (301)                         | 28.9 (404)                       | 32.1 (122)                             | 29.8 (583)                       |
| Married, N (%)                          | 40.4 (408)                         | 33.7 (672)                       | 43.1 (224)                             | 34.4 (856)                       | 40.4 (385)                         | 34.7 (493)                       | 43.0 (166)                             | 35.8 (712)                       |
| Having child, N (%)                     | 15.1 (153)                         | 12.5 (250)                       | 21.7 (113)                             | 11.7 (290)                       | 15.1 (144)                         | 12.5 (177)                       | 19.7 (76)                              | 12.3 (245)                       |
| Other tobacco use, past 6 months, N (%) |                                    |                                  |                                        |                                  |                                    |                                  |                                        |                                  |
| Cigarettes                              | 37.0 (374)                         | 31.0 (619)                       | 52.1 (271)                             | 29.0 (722)                       | 29.5 (281)                         | 30.3 (431)                       | 39.6 (153)                             | 28.1 (559)                       |
| Other tobacco products^                 | 37.6 (379)                         | 32.1 (639)                       | 48.9 (252)                             | 30.8 (766)                       | 28.6 (272)                         | 32.4 (460)                       | 37.8 (145)                             | 29.6 (587)                       |

^ Other tobacco included little cigars/cigarillos, hookah, and smokeless tobacco.

Note: Significant Chi-Square/t-tests for bivariate associations ( $p < .05$ ) for: 1) Wave 1 exposure to e-cigarette ads: Exposure to e-cigarette reviews, MSA, Race, Employment, Married, Having child, Past 6-month cigarette and other tobacco use; 2) Wave 1 exposure to e-cigarette reviews: all except for sexual minority; 3) Wave 3 exposure to e-cigarette ads: Exposure to e-cigarette reviews, MSA, Race, Married, Past 6-month other tobacco use; 4) Wave 3 exposure to e-cigarette reviews: all except for gender and sexual minority.

**Supplementary Table S3. Sensitivity analysis - adjusted associations between exposure to e-cigarette ads or reviews in the past 30 days and e-cigarette use at follow-up waves by baseline e-cigarette use status.**

| Short-term follow-up               |                             |                            |                            |                           | Long-term follow-up        |                           |                            |                           |
|------------------------------------|-----------------------------|----------------------------|----------------------------|---------------------------|----------------------------|---------------------------|----------------------------|---------------------------|
| Baseline sample                    | Never users                 | Former users               | Recent former users        | Current users             | Never users                | Former users              | Recent former users        | Current users             |
| E-cigarette use at follow-up waves | Initiated using             | Became P6M user            | Became current users       | Number of days using      | Initiated using            | Became P6M user           | Became current users       | Number of days using      |
|                                    | aOR (95% CI)                | aOR (95% CI)               | aOR (95% CI)               | IRR (95% CI)              | aOR (95% CI)               | aOR (95% CI)              | aOR (95% CI)               | IRR (95% CI)              |
| Exposure to e-cigarette ads        | 0.94 (0.73 - 1.21)          | 0.83 (0.69 - 1.01)         | 0.70 (0.48 - 1.02)         | <b>0.95 (0.91 - 1.00)</b> | 0.94 (0.75 - 1.18)         | 0.89 (0.76 - 1.06)        | 0.83 (0.58 - 1.19)         | 0.99 (0.94 - 1.05)        |
| Exposure to e-cigarette reviews    | 1.11 (0.80 - 1.54)          | 1.16 (0.90 - 1.49)         | <b>1.76 (1.13 - 2.73)</b>  | <b>1.09 (1.04 - 1.14)</b> | 1.09 (0.80 - 1.48)         | 0.99 (0.80 - 1.23)        | 1.24 (0.83 - 1.86)         | <b>1.07 (1.01 - 1.13)</b> |
| Age                                | 0.95 (0.90 - 1.01)          | <b>0.93 (0.87 - 0.98)</b>  | <b>0.89 (0.80 - 0.99)</b>  | 1.01 (1.00 - 1.02)        | <b>0.91 (0.86 - 0.97)</b>  | <b>0.90 (0.85 - 0.96)</b> | 0.97 (0.88 - 1.07)         | 1.01 (0.99 - 1.02)        |
| MSA                                |                             |                            |                            |                           |                            |                           |                            |                           |
| Atlanta                            | Reference                   | Reference                  | Reference                  | Reference                 | Reference                  | Reference                 | Reference                  | Reference                 |
| Boston                             | 1.03 (0.53 - 1.98)          | <b>3.24 (1.50 - 7.02)</b>  | 2.45 (0.82 - 7.33)         | <b>0.83 (0.69 - 0.99)</b> | 0.85 (0.46 - 1.58)         | 1.83 (0.95 - 3.54)        | 1.98 (0.66 - 5.96)         | <b>0.68 (0.56 - 0.83)</b> |
| Minneapolis                        | 0.77 (0.34 - 1.76)          | <b>3.21 (1.46 - 7.07)</b>  | 1.64 (0.53 - 5.03)         | <b>1.24 (1.06 - 1.44)</b> | 0.47 (0.20 - 1.14)         | 0.95 (0.46 - 1.95)        | <b>3.63 (1.14 - 11.56)</b> | 1.02 (0.86 - 1.20)        |
| Oklahoma City                      | 0.83 (0.33 - 2.03)          | <b>4.80 (1.87 - 12.30)</b> | 1.90 (0.37 - 9.78)         | 1.09 (0.90 - 1.31)        | 0.69 (0.28 - 1.71)         | <b>2.73 (1.28 - 5.82)</b> | 2.16 (0.42 - 10.99)        | 0.89 (0.72 - 1.09)        |
| San Diego                          | 1.27 (0.64 - 2.54)          | <b>3.60 (1.58 - 8.22)</b>  | 2.89 (0.85 - 9.82)         | 1.03 (0.87 - 1.22)        | 1.22 (0.64 - 2.33)         | 1.55 (0.77 - 3.11)        | 3.14 (0.89 - 11.07)        | 0.92 (0.77 - 1.10)        |
| Seattle                            | 0.66 (0.26 - 1.66)          | <b>2.69 (1.12 - 6.43)</b>  | 1.10 (0.29 - 4.09)         | 1.06 (0.90 - 1.25)        | 1.19 (0.56 - 2.51)         | 1.30 (0.63 - 2.68)        | 1.79 (0.42 - 7.69)         | 0.90 (0.75 - 1.08)        |
| Other                              | --                          | 0.98 (0.17 - 5.74)         | --                         | 0.65 (0.35 - 1.20)        | 0.41 (0.04 - 4.71)         | 0.52 (0.09 - 2.81)        | 13.15 (0.96 - 180.28)      | 0.74 (0.43 - 1.27)        |
| Sex                                |                             |                            |                            |                           |                            |                           |                            |                           |
| Male                               | 1.01 (0.63 - 1.60)          | 0.74 (0.49 - 1.11)         | 0.88 (0.45 - 1.69)         | 0.93 (0.84 - 1.03)        | 0.92 (0.60 - 1.42)         | 0.95 (0.62 - 1.47)        | 0.98 (0.50 - 1.90)         | <b>0.89 (0.80 - 1.00)</b> |
| Female                             | 0.88 (0.18 - 4.37)          | 1.18 (0.43 - 3.18)         | 1.30 (0.21 - 7.85)         | 1.00 (0.73 - 1.37)        | 0.51 (0.09 - 2.93)         | 0.77 (0.25 - 2.38)        | --                         | 0.97 (0.67 - 1.41)        |
| Other                              | Reference                   | Reference                  | Reference                  | Reference                 | Reference                  | Reference                 | Reference                  | Reference                 |
| Race                               |                             |                            |                            |                           |                            |                           |                            |                           |
| Non-Hispanic White                 | Reference                   | Reference                  | Reference                  | Reference                 | Reference                  | Reference                 | Reference                  | Reference                 |
| Non-Hispanic Black                 | 0.93 (0.33 - 2.62)          | 0.99 (0.36 - 2.71)         | <b>7.86 (1.61 - 38.35)</b> | <b>0.37 (0.24 - 0.57)</b> | 0.71 (0.26 - 1.97)         | 0.74 (0.29 - 1.89)        | 2.05 (0.28 - 14.93)        | <b>0.37 (0.25 - 0.53)</b> |
| Non-Hispanic Other                 | 1.37 (0.77 - 2.43)          | 1.10 (0.64 - 1.89)         | 1.22 (0.49 - 3.02)         | <b>0.83 (0.72 - 0.95)</b> | 1.29 (0.78 - 2.12)         | 0.97 (0.56 - 1.67)        | 1.51 (0.60 - 3.77)         | <b>0.79 (0.67 - 0.93)</b> |
| Hispanic                           | 1.44 (0.68 - 3.06)          | 0.59 (0.30 - 1.16)         | 0.78 (0.25 - 2.43)         | <b>0.79 (0.68 - 0.92)</b> | 0.92 (0.43 - 1.93)         | 0.79 (0.43 - 1.46)        | 0.86 (0.21 - 3.58)         | <b>0.74 (0.62 - 0.88)</b> |
| Education (Ref: < college)         | 0.83 (0.47 - 1.48)          | 1.18 (0.68 - 2.05)         | 0.91 (0.39 - 2.13)         | <b>0.84 (0.76 - 0.93)</b> | 0.59 (0.35 - 1.02)         | 0.87 (0.53 - 1.43)        | 0.70 (0.31 - 1.57)         | <b>0.85 (0.75 - 0.95)</b> |
| Employment (Ref: unemployed)       | 1.51 (0.89 - 2.54)          | 1.09 (0.67 - 1.77)         | 0.58 (0.29 - 1.15)         | 1.06 (0.95 - 1.18)        | <b>1.86 (1.08 - 3.19)</b>  | 0.84 (0.54 - 1.31)        | 0.97 (0.47 - 2.01)         | <b>1.16 (1.03 - 1.32)</b> |
| Sexual minority (Ref: No)          | <b>2.02 (1.23 - 3.32)</b>   | 1.26 (0.78 - 2.02)         | 0.61 (0.32 - 1.17)         | 1.02 (0.91 - 1.13)        | 1.29 (0.77 - 2.14)         | 1.31 (0.88 - 1.96)        | 0.86 (0.45 - 1.65)         | 1.07 (0.96 - 1.21)        |
| Married (Ref: No)                  | 0.78 (0.45 - 1.35)          | 0.76 (0.48 - 1.21)         | 1.17 (0.47 - 2.87)         | <b>1.16 (1.05 - 1.29)</b> | 1.05 (0.62 - 1.76)         | 1.27 (0.82 - 1.97)        | <b>0.18 (0.07 - 0.47)</b>  | <b>1.16 (1.03 - 1.30)</b> |
| Having child (Ref: No)             | 0.85 (0.34 - 2.14)          | 1.75 (0.95 - 3.23)         | 2.46 (0.70 - 8.60)         | 0.98 (0.84 - 1.13)        | 1.28 (0.58 - 2.85)         | 1.36 (0.73 - 2.53)        | <b>5.57 (1.48 - 20.98)</b> | 1.01 (0.86 - 1.19)        |
| Other tobacco use, past 6 months   |                             |                            |                            |                           |                            |                           |                            |                           |
| Cigarettes (Ref: No)               | <b>10.99 (6.15 - 19.65)</b> | <b>4.54 (2.88 - 7.17)</b>  | <b>4.03 (1.90 - 8.55)</b>  | 1.06 (0.96 - 1.17)        | <b>9.01 (5.16 - 15.73)</b> | <b>5.21 (3.23 - 8.40)</b> | <b>5.54 (2.64 - 11.63)</b> | 1.07 (0.96 - 1.20)        |
| Other tobacco products (Ref: No)^  | <b>3.64 (2.02 - 6.58)</b>   | <b>3.92 (2.47 - 6.23)</b>  | 1.60 (0.75 - 3.41)         | 1.02 (0.92 - 1.12)        | <b>4.55 (2.60 - 7.99)</b>  | <b>2.78 (1.67 - 4.62)</b> | <b>2.65 (1.11 - 6.35)</b>  | 0.98 (0.88 - 1.10)        |

Notes: P6M=past 6-month. ^ Other tobacco included little cigars/cigarillos, hookah, and smokeless tobacco. Boldface indicates p<.05.
